# Supplementary material for: The importance of Au⋯π(aryl) interactions in the formation of spherical aggregates in binuclear phosphane gold(i) complexes of a bipodal thiocarbamate dianion: a combined crystallographic and computational study, and anti-microbial activity
Source: Royal Society of Chemistry journal article supplement (doi:10.1039/c5ra05604g), 2015-01-01
Supplement: c5ra05604g1.pdf [file c5ra05604g1.pdf]

**The importance of Au... $\pi$ (aryl) interactions in the formation of spherical aggregates in binuclear phosphanegold(I) complexes of a bipodal thiocarbamate dianion: A combined crystallographic and computational study, and anti-microbial activity†**

Chien Ing Yeo,<sup>a</sup> C.-H. Khoo,<sup>b</sup> W.-C. Chu,<sup>b</sup> B.-J. Chen,<sup>b</sup> P.-L. Chu,<sup>b</sup> J.-H. Sim,<sup>b</sup> Y.-K. Cheah,<sup>\*b</sup>

Jimmy Ahmad,<sup>a</sup> Siti Nadiah Abdul Halim,<sup>a</sup> Hoi-Ling Seng,<sup>c</sup> Soon Ng,<sup>a</sup> A. Otero-de-la-Roza<sup>\*d</sup>

and Edward R. T. Tiekink<sup>\*a</sup>

<sup>a</sup> *Department of Chemistry, University of Malaya, 50603 Kuala Lumpur, Malaysia.*

*E-mail: [Edward.Tiekink@gmail.com](mailto:Edward.Tiekink@gmail.com)*

<sup>b</sup> *Department of Biomedical Science, Faculty of Medicine and Health Sciences, University Putra Malaysia, 43400 Serdang, Selangor Darul Ehsan, Malaysia.*

*E-mail: [ykcheah@medic.upm.edu.my](mailto:ykcheah@medic.upm.edu.my)*

<sup>c</sup> *Department of Biological Sciences, Faculty of Science and Technology, Sunway University, 47500 Bandar Sunway, Selangor Darul Ehsan, Malaysia*

<sup>d</sup> *National Institute for Nanotechnology, National Research Council of Canada, 11421 Saskatchewan Drive, Edmonton, Alberta, Canada T6G 2M9.*

*E-mail: [alberto.oterodelaroz@nrc-cnrc.gc.ca](mailto:alberto.oterodelaroz@nrc-cnrc.gc.ca)*

**### ELECTRONIC SUPPLEMENTARY INFORMATION ###**

**Figure S(1).** Experimental (red trace) and simulated based on the single crystal structure (blue trace) PXRD patterns for (a) **1**, (b) **2** and (c) **3**. These show that the single crystal data reported herein for each of **1–3** match the structure of the bulk material in each case.

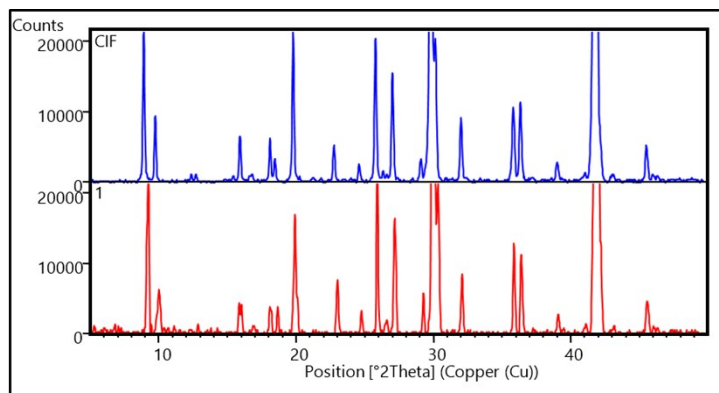

(a)

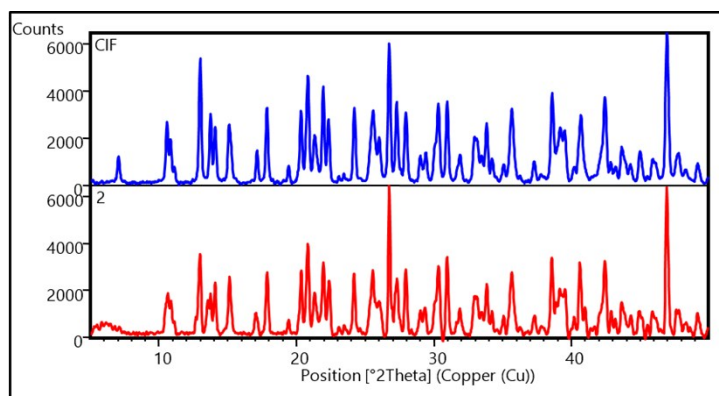

(b)

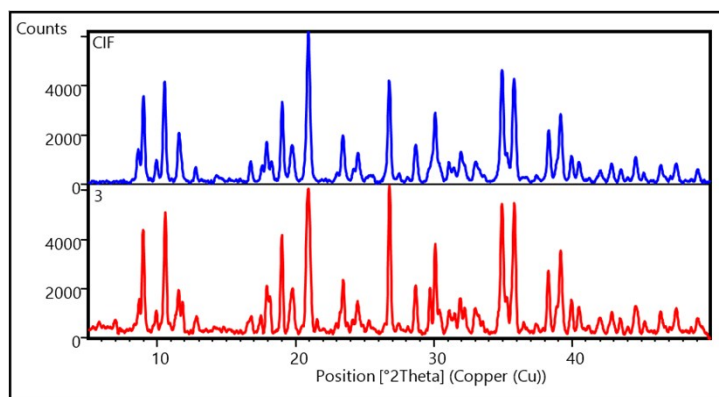

(c)

**Figure S(2).** Variable  $^1\text{H}$  NMR study in DMSO- $d_6$  for  $\text{LH}_2$ : (a) coalescence in the resonances due to aryl-H with increasing temperature, and (b) sharpening and downfield shift in the resonances due to methyl-H with increasing temperature. The temperature range was 28–78  $^\circ\text{C}$  with 10  $^\circ\text{C}$  increments.

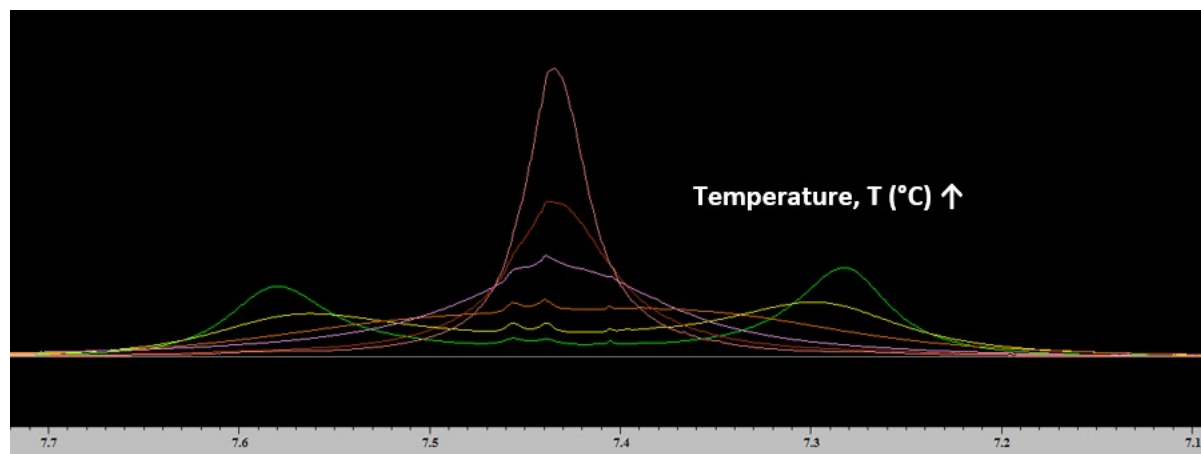

(a)

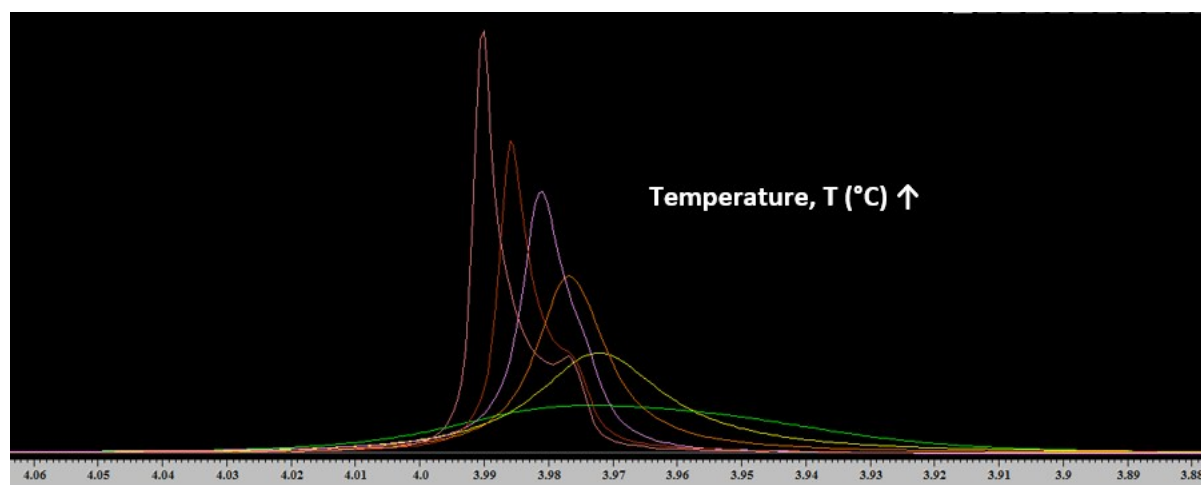

(b)

**Figure S(3).** Crystal packing diagrams for (a) **1**, (b) **2** and (c) **3**, viewed in projection down the *a*-axis in each case. In **2**, there are phenyl-C–H... $\pi$ (aryl) interactions [C23–H23...Cg(C31-C36) = 2.82 Å, C23...Cg(C31-C36) = 3.599(4) Å with angle at H23 = 140° for symmetry operation: 2-*x*, 2-*y*, 1-*z*] shown as purple dashed lines, and in **3**, there are methylene-C–H...O interactions shown as orange dashed lines [C14–H14a...O1 = 2.58 Å, C14...O1 = 3.266(3) Å with angle at H14a = 127° for symmetry operation: *x*, -1+*y*, *z*].

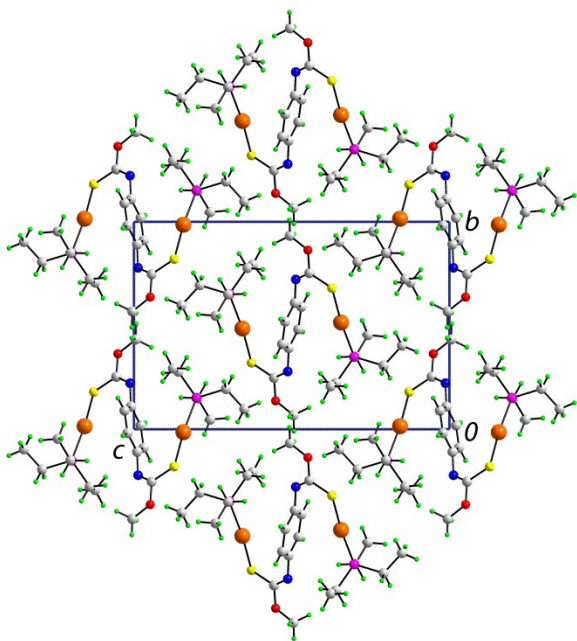

(a)

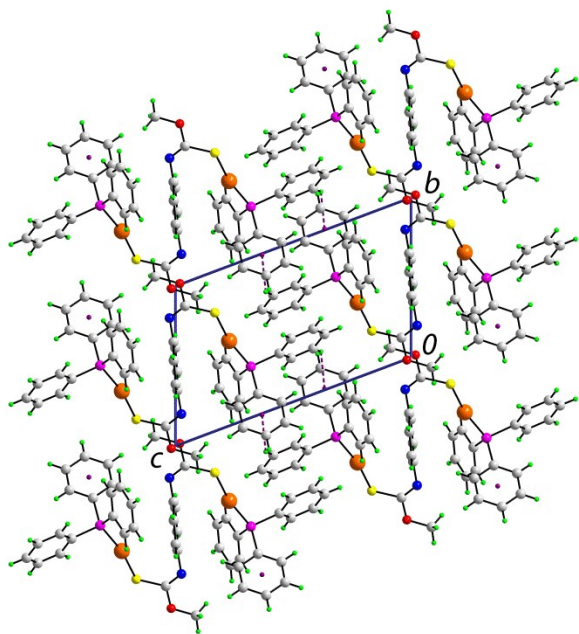

(b)

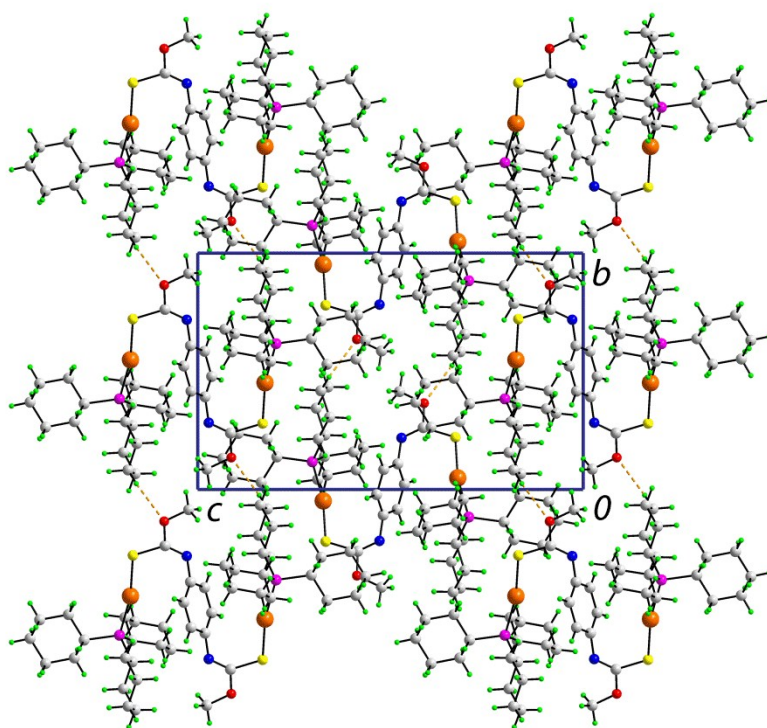

(c)

**Figure S(4).** Thermogravimetric traces for (a) **1**, (b) **2** and (c) **3**.

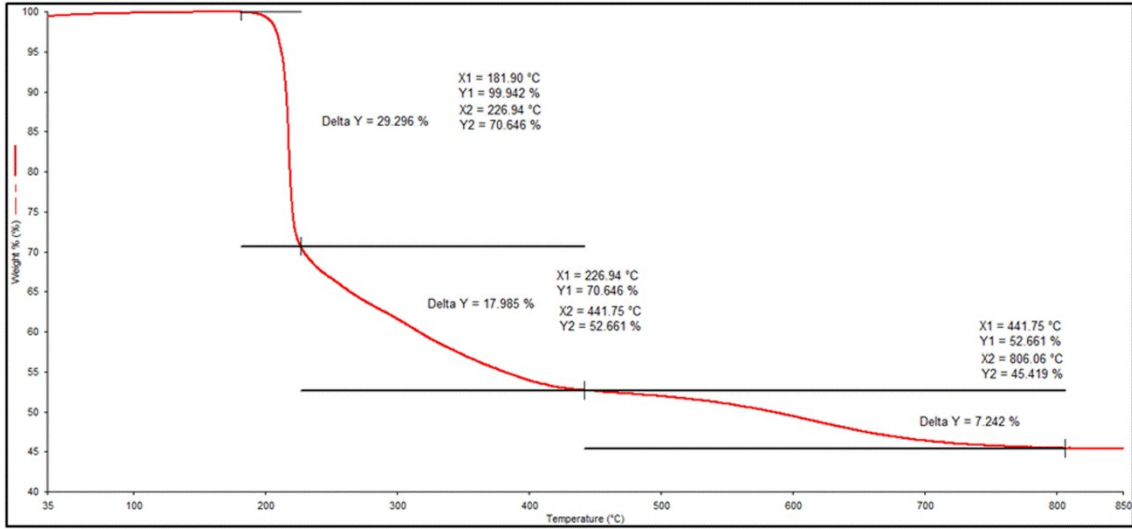

(a)

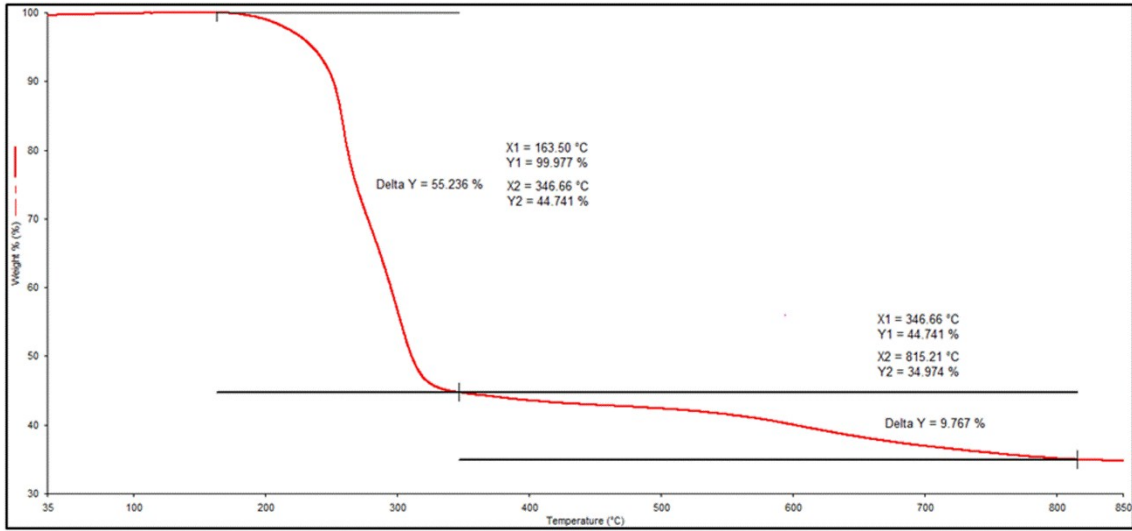

(b)

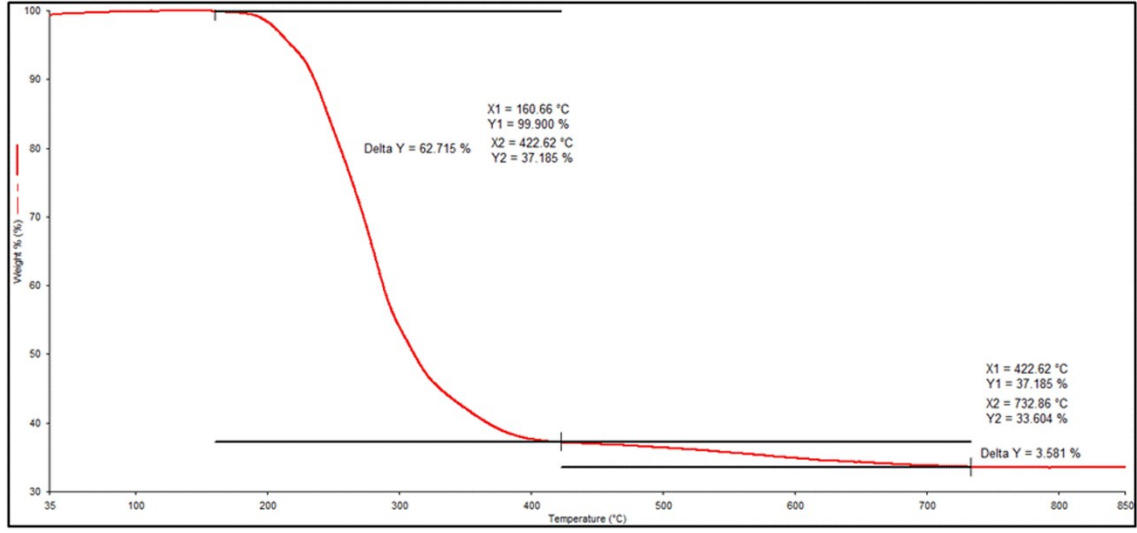

(c)
